1 **Pan-genome analysis of *Mycobacterium tuberculosis* identifies accessory genome**  
2 **sequences deleted in modern Beijing lineage.**

3

4 **Running title: Mutations among drug resistant genes**

5 Syed Beenish Rufai<sup>1</sup>, Egon A. Ozer<sup>2</sup>, Sarman Singh<sup>3#</sup>

6 <sup>1</sup>Division of Clinical Microbiology and Molecular Medicine, Department of Laboratory  
7 Medicine, All India Institute of Medical Sciences, New Delhi, India

8 <sup>2</sup>Department of Medicine, Division of Infectious Diseases, North-western University Feinberg  
9 School of Medicine, Chicago, Illinois, USA

10 <sup>3</sup>Department of Microbiology All India Institute of Medical Sciences, Bhopal, India

11

12

13

14

15

16

17 **# Corresponding Author:**

18 Prof. Sarman Singh, MD,

19 Department of Microbiology

20 All India Institute of Medical Sciences,

21 Saket Nagar, Bhopal (India)

22 Phone: +91-755-2672317, 2672111

23 Fax: +91-755-2672337

24 Email: [sarman\\_singh@yahoo.com](mailto:sarman_singh@yahoo.com), [sarman.singh@gmail.com](mailto:sarman.singh@gmail.com)

25 **Abstract (word count 235):**

26 Beijing sub-lineage of *Mycobacterium tuberculosis* has been reported to have increased  
27 transmissibility and drug resistance. This led us to get insights of genomic landscape of modern  
28 Beijing sub-lineages in comparison with other lineages of *M. tuberculosis* utilizing pan-  
29 genomics approach. Pangenome analysis was performed using software Spine (v0.2.3), AGEnt  
30 (v0.2.3) and ClustAGE (v0.7.6). The average pangenome size was 45,40,849 bp with 4,391  
31 coding sequences (CDS), with a GC content of 65.4%. The size of the core genome was  
32 36,83,161 bp, contained 3,698 CDS and had an average GC content of 65.1%. The average  
33 accessory genome size was 6,96,320.9 bp, with 539.4 CDS and GC content of 67.9%. Among  
34 the accessory elements complete deletion of CRISPR-associated endoribonuclease cas1  
35 (*Rv2817c*), cas2 (*Rv2816c*), CRISPR type III-a/mtube-associated protein csm6 (*Rv2818c*),  
36 CRISPR type III-a/mtube-associated ramp protein csm5 (*Rv2819c*) and partial deletion  
37 (61.5%) CRISPR type III-a/mtube-associated ramp protein csm4 (*Rv2820c*) sequences was  
38 found specifically in modern Beijing lineages taken in assortment. The sequences were  
39 validated using conventional PCR method, which precisely amplified the corresponding targets  
40 of sequence elements with 100% sensitivity and specificity. Deletion of accessory CRISPR  
41 sequence elements amongst the modern Beijing sub-lineage of *M. tuberculosis* suggest more  
42 defective DNA-repair in these strains which may enhance virulence of the strains. Further, the  
43 developed conventional PCR approach for detection of virulent modern Beijing lineage may  
44 be of interest to public health and outbreak control organizations for rapid detection of modern  
45 Beijing lineage.

46

47

48

49 **Introduction (3687):**

50 The emergence of resistance towards first and second line anti-tuberculosis drugs in *M.*  
51 *tuberculosis* strains poses an increasing threat to public health (1). Estimates from TB  
52 investigation data predicts an expected increase in Multi-drug resistant (MDR) and extensively  
53 drug resistant (XDR) TB especially in developing countries like India, Philippines, Russia and  
54 South Africa (2). Classical techniques of determining genotyping and recently Whole genome  
55 sequencing (WGS) have revealed significant evolution of strains leading to diversity among  
56 human adapted *M. tuberculosis* strains, leading to acquire various genetic mechanisms for  
57 successful transmission and survival in the population (3).

58 Among different lineage of lineages of *M. tuberculosis* which include lineages Indo Oceanic,  
59 Euro-American, Central Asian, and the East Asian (Beijing-sub lineage) is known to have  
60 originated out of East Asia and has disseminated around the world. The variability in gene  
61 expression patterns of different strains of *M. tuberculosis* during infection and intra/inter  
62 genomic variation among pathogenic strains has been documented as a significant feature in  
63 pathogenesis and types of infection caused by the strains (4). The Beijing sub-lineage is  
64 reported as more virulent in comparison to other lineages of *M. tuberculosis* in terms of an  
65 enhanced level of pathogenicity leading to increased transmissibility, rapid progression from  
66 latent to active disease, epidemiological association with transmission outbreaks and increased  
67 frequency of antibiotic resistance suggesting that genetic modifications distinguish the  
68 virulence and pathogenicity of this lineage (5–11). The global spread and association of Beijing  
69 strains with drug resistance has also been documented from India and other parts of world  
70 which is driving attention of researchers to further understand the genomic features that make  
71 this lineage more virulent in comparison to that of other lineages of *M. tuberculosis* (6, 8, 12–  
72 14).

73 With the advent of next-generation sequencing (NGS) technologies, WGS has been used  
74 widely to identify evolutionary markers, polymorphism across lineages and mutations  
75 associated with drug resistance in *M. tuberculosis* (15). With availability of genomic databases  
76 and whole genome sequences of *M. tuberculosis*, approaches for deciphering novel mutations  
77 in comparison to reference strains are being utilized which results in loss of unique coding  
78 sequences(CDS)/genes that may have role in virulence or acquiring drug resistance (16).To  
79 overcome this, pan-genome based approach has been preferred which discern a more complete  
80 gene landscape for identification of unique (specific to single strains), accessory (shared among  
81 two or more strains) and core genes (present in all strains) for estimating the genomic diversity  
82 and identification of novel/unique gene sequences and discovery of markers for lineage  
83 identification (16–18).

84 WGS of *M. tuberculosis* isolates has been performed on isolates from Malaysia, China,  
85 Myanmar, Peru, Colombia, India, Ireland, New Zealand, Africa, Korea and Russia and large  
86 collection of genomes from clinical isolates of *M. tuberculosis* were analyzed by Manson et al  
87 2017 [21–25]. But no pangenome studies were done on *M. tuberculosis* diversity of lineages  
88 to understand the variations in terms of unique genes/ sequences among them. This study was  
89 aimed to identify unique and shared sequences in the three laboratory sequenced TB isolates  
90 and WGS *M. tuberculosis* genomes data available in the public domain to decipher novel  
91 markers that may be questioned for higher virulence in the Beijing lineage.

## 92 **Material and Methods:**

93 This study was performed in an accredited TB laboratory in the Division of Clinical  
94 Microbiology & Molecular Medicine, All India Institute of Medical Sciences, New Delhi.  
95 Representative XDR-TB (L-823, L-182 and L-31) isolates of known drug susceptibility testing  
96 (DST) patterns and spoligotypes published previously were selected for WGS (19).

97 **Whole genome sequencing of three lab isolated XDR-TB:**

98 Whole genome sequencing of the three XDR-TB isolates was performed using Ion Torrent  
99 PGM platform (Life Technologies). Briefly, DNA extraction was performed as previously  
100 described (20). The three genomes were sequenced using Ion Torrent PGM as published  
101 previously (19). Sequencing data generated by Ion Torrent PGM was analyzed using the  
102 Torrent Suite Software. De-novo assembly of sequenced data was performed using ion-plugin-  
103 assembler St. Petersburg genome assembler (SPades) (v 3.1.0) (19, 21). The three whole  
104 genomes sequences were deposited in GenBank under the accession  
105 numbers NDYV000000000 for L-182 (beijing strain), NCTW000000000 for L-823 (beijing  
106 strain) and NDYU000000000 L-31 (central Asian strain).

107 **Data mining of whole Genome Draft sequences of *M. tuberculosis* isolates from the NCBI**  
108 **genome database:**

109 In order to understand complete genomic repertoire, analysis of different *M. tuberculosis*  
110 genomes was required for in depth analysis. Due to lack of funding we only did WGS of  
111 representative XDR-TB isolates. We explored the work of *Manson et al., 2017* which already  
112 have analyzed more than five thousand genomes different lineages and variable geographical  
113 diversity (Manson et al., 2017) and selected 91 genomes based on diversity of lineages and  
114 geographical locations (22). We performed random search in  
115 (<https://www.ncbi.nlm.nih.gov/sra>) using the search terms “*Mycobacterium tuberculosis*” and  
116 selected 25 genomes recently published from diverse geographical locations. A total 121  
117 genomes were taken for pan-genome analysis as per the available computational feasibility in  
118 our setup. Among 121 draft genome assemblies, three were sequenced XDR-TB genomes at  
119 our setting, 116 were draft genome assemblies downloaded from NCBI and two were reference

120 strains of *M. tuberculosis* under accession number NC\_000962.3 and AL12345.6 respectively  
121 **(Supplementary Table 1).**

### 122 **Pan-genome analysis of 121 isolates:**

123 Pan-genome analysis of isolates was performed using the software suite Spine, AGent and  
124 ClustAGE (17, 23). This software identifies the nucleotide sequences and associated  
125 annotations of the core, accessory and unique genome fractions of a sequenced strain  
126 population.

127 Spine v 0.2.3 was used for the identification of the conserved core genome sequence of the set  
128 of 121 *M. tuberculosis* genomes using H37Rv (NC\_00926.3) as the reference genome sequence  
129 for a strict core genome (genomic sequence present in 100% of the strains) and using  
130 AL12345.6 as the reference genome for extraction of soft core genome (core genome sequence  
131 present in at least 90% of the strains) (17). AGent v0.2.3 was used for identifying accessory  
132 genomic elements (AGEs) in bacterial genomes by using an in-silico subtractive hybridization  
133 approach against a core genome generated using the Spine algorithm (17). ClustAGE (v0.7.5)  
134 was used to compare accessory genomic elements (AGEs) between genomes. The default  
135 threshold for alignments of 85% sequence identity over at least 100 bp was used (23).

### 136 **Estimation of phylogenetic tree using kSNP 3.0:**

137 kSNP3 program was used for construction of phylogenetic parsimony tree using pan-genome  
138 SNPs from a set of genome sequences without use of reference genome and parsimony tree  
139 that is estimated as a consensus of up to 100 equally parsimonious trees. Pan-genome  
140 parsimony tree was constructed using kSNP 3.0 (24). *K-chooser* was used to determine the  
141 optimum *k-mer* size, which was set at 21.

### 142 **Visualization of trees:**

143 Trees were visualized using Interactive tree of Life (iTOL) V3 with Bootstrapped values of  
144 original and resampled tree <https://itol.embl.de> (25).

#### 145 **Functional annotation of core and accessory genomes sequences:**

146 Functional annotation of core, accessory and unique genome sequences were transferred from  
147 orthologs of taxa group Actinobacteria (Mycobacteriaceae) using EggNOG mapper v2 (26).  
148 COG letter categories obtained were patterned for functional description in COG database (27).

149

#### 150 **Standardization of conventional PCR for validation of sequences on clinical isolates:**

151 Primers were designed using Primer 3 (V 4.1.0) for validation of sequences/ genomic fractions  
152 specific to lineage found from pangenome data analysis (28). Designed primers were obtained  
153 from Eurofins, India. DNA was isolated from clinical isolates (50 Beijing strains and 50 non-  
154 Beijing strains) and subjected to PCR as follows: 2.5 µl of 10X buffer, 500 mM KCl] supplied  
155 with 1 ml of 50 mM MgCl<sub>2</sub>, 0.5 µl of stock 10mM dNTP, 20pmol of each primer and 1.25U  
156 of Taq DNA polymerase and 5µl of template DNA. Each PCR was started with a 'hot Start' for  
157 2min at 95°C followed by denaturation (25 cycles each of 15 sec at 95°C), annealing (25 cycles  
158 each of 15 sec at 55°C) and extension (25 cycles each of 45 sec at 68°C), and a final extension  
159 for 1 cycle for 5 min at 68°C in a thermal Cyclor (MJ Research, USA) and amplified products  
160 were resolved through 2% agarose gel in Tris-acetate buffer.

#### 161 **Results:**

##### 162 **Description of *M. tuberculosis* data sets used in study:**

163 Of total 121 genomes used in study, apart from two reference strains, 44 (36.3%) genomes  
164 were of African origin, 40 (31.4%) from Asia, 29 (23.1%) from Europe and 6 (4.9%) from

165 America. Place of origin and accession numbers of all draft genomes are mentioned in  
166 **(Supplementary Table 1).**

167 **Genome assembly statistics of three XDR-TB isolates:**

168 *De novo* sequence assembly was performed using SPAdes v3.1.0 and functional annotation  
169 performed using RAST (Rapid Annotation using Subsystem Technology) yielding total  
170 genome sizes of 4,201,682, 4,288,294 and 4,311,779 bp with 65, 65.4 and 65.3% GC contents,  
171 and coding sequences of 4516, 4737 and 4813 for L-823, L-182 and L-31 respectively(19).  
172 Using spoligotyping technique, L-182 and L-823 were found to be Beijing sub-lineage of ST1  
173 and ST236, and L-31 was found to be central Asian strain of ST1120 as per the SITVIT2  
174 database (29).

175 **Construction of parsimony and core genome tree:**

176 Unrooted phylogenetic tree was constructed comparing the 121 WGS genome sequences in the  
177 context of the *M. tuberculosis* lineages circulating globally (**Figure 1**). Total of 18,025 variable  
178 single nucleotide positions were extracted from these genome sequences to construct a  
179 phylogenetic parsimony tree. Among the genomes with known lineages, three genomes from  
180 each lineage group were taken as reference. After analysis, *M. tuberculosis* genomes were  
181 dispersed among four lineages Lineage 1(8; 6.6%), Lineage 2 (42; 34.7%), Lineage 3 (8; 6.6%)  
182 and Lineage 4 (63; 52.1%) respectively (**Supplementary Table 2**).

183 **Description of pan-genome (hard core, soft core and accessory genome):**

184 Total pan-genome size was estimated to be 4,540,489 bp with 4391 coding sequences (CDS),  
185 and a GC content of 65.4%. Estimated average size of the hard-core genome (i.e., sequence  
186 present in 100% of genomes) was 3,683,161 bp (81.1% of total genome size), contained 3,698  
187 coding sequences (CDS) and had an average GC content of 65.1% as compared to the average



188 accessory genome size of 696,320.9 bp (15.3%), and GC content of 67.9%. Estimated average  
189 size of the soft-core genome (i.e. sequence present in  $\geq 90\%$  genomes) was 4,308,602 bp  
190 (94.8% of total genome size), contained 4,237 CDS and had an average GC content of 65.4%  
191 as compared to the average accessory genome size 93,819.7 bp (2.1%), with 57.6 CDS and GC  
192 content of 71.7% (**Table 1**) (**Supplementary Table 3**).

### 193 **Determination of core genome:**

194 In order to better estimate the likely species core genome size, a rigorous definition of core  
195 genome was used. Core genome represented a total of 81.1% of the overall pan-genome  
196 repertoire. The average amount of core genome and pan-genome as a function of the number  
197 of reference genome (NC\_000962.3) included in the analysis was computed using an  
198 adaptation of the method described by *Tettelin et al 2005* (16) (**Fig 2 & 3**).

### 199 **Functional annotation of core and accessory genome elements:**

200 Functional annotation of coding sequences (CDS) associated with hard-core and accessory  
201 genome were analyzed using EggNOG mapper v2. Coding sequences belonging to the core  
202 genomes were assigned to putative super-functional (**Fig 4A**) and functional (**Fig 4B**)  
203 categories using the Clusters of Orthologous Groups of proteins (COG) database. Matching of  
204 gene ontology terms with COG database predicted more than half of CDS in core genome were  
205 dedicated with metabolism functions, one fourth was of unknown function or poorly  
206 characterized and rest of CDS were involved in cellular processes and signaling, and  
207 Information storage and processing.

208 Coding sequences belonging to the accessory genomes were assigned to putative super-  
209 functional (**Fig 4A**) and functional (**Figure 4B**) categories using COG database which  
210 predicted one fourth of CDS in accessory genome were dedicated with metabolism, nearly one

211 fourth of all CDS were associated with cellular and signaling processes, and Information  
212 storage and processing. Rest of the CDS were of unknown function.

213 Functional annotation of CDS associated with unique accessory elements (unique to each  
214 genome) predicted most of the genes that were acquired during the adaptation were associated  
215 with metabolism (26%), cell storage and signaling (25%), information storage and processing  
216 (20%) and rest of CDS were associated with unknown function or poorly characterized (**Fig**  
217 **5**). Variation of accessory genomic elements, among soft- and hard-core components are shown  
218 in heat map generated by ClustAGE software (**Fig. 6**).

#### 219 **Clustering, distribution analysis and functional annotation of accessory nucleotide** 220 **sequences:**

221 Accessory genomic elements (AGE's) in the population, also referred to as bins, were  
222 identified using ClustAGE software (23). A total of 651 individual AGE's hereafter referred  
223 as bins were found to be present in total input of 121 genomes that ranged in size from 201 bp  
224 to 37765 bp. The average size of the bins (651bins) was 1230.5 bp. These bins were further  
225 subdivided to sub-elements in order to see sharing and unique sequence elements among  
226 genomes. Total 859 sub-elements of sizes more than 200 bp were found in these genomes (n  
227 > 1). Shared sequences obtained from accessory elements obtained on analysing hard-core  
228 repertoire in *M. tuberculosis* strains (90%) as shown in ClustAGE plots (**Fig 7A & 7B**). Of the  
229 total genomes taken in assortment, 11 (9%) of *M. tuberculosis* genomes was having 139 unique  
230 sub-elements with an average length of 459.6 bp.

#### 231 **Identification of novel markers among AGE's:**

232 Among the shared accessory genome sequences, portions of one 4487 bp AGE (bin 32) was  
233 found to be absent in all of the Beijing genomes (**Fig 8**). To better understand the nature of the  
234 deleted genomic sequence, bin 32 was further divided into discrete sub elements which

235 revealed the portion of the AGE missing in the Beijing lineage strains, named bin32se-0001,  
236 encoded all or some of the following genes: CRISPR-associated endo-ribonuclease cas2  
237 (100%); CRISPR-associated endonuclease cas1 (100%); CRISPR type III-a/mtube-associated  
238 protein csm6 (100%); CRISPR type III-a/mtube-associated protein csm5 (100%); and CRISPR  
239 type III-a/mtube-associated ramp protein csm4 (61.5%) (**Table 2**).

#### 240 **Standardization of PCR for validation of sequences on clinical isolates:**

241 Designed primers were used for convention PCR for validation of sequences on culture  
242 isolates. Designed primers specific for CRISPR sequences are mentioned in (**Table 3**). The  
243 PCR precisely amplified the corresponding targets from DNA isolated from the 50 non-Beijing  
244 strains and control strain H37Rv. No amplification was seen among the 50 DNA samples  
245 isolated from Beijing isolates (**Fig 9A, 9B**). Spoligotyping patterns of isolates used for  
246 evaluation are mentioned in (**Table 4**).

#### 247 **Discussion :**

248 The main causative agent of TB in humans *M. tuberculosis sensu stricto* and of major concern  
249 is uncontrolled spread of drug resistance in developing countries (30). Total of four lineages  
250 (lineage 1-4) have been recognized within the *M. tuberculosis* species showing difference in  
251 characteristics in terms of evolutionary position, transmissibility, drug resistance, host  
252 interaction, latency, and vaccine efficacy (31). With growing evidence, it is known that genetic  
253 diversity of *M. tuberculosis* may have significant clinical consequences and sub-lineages were  
254 also reported to show similar variation characteristics especially Beijing sub-lineage (East  
255 Asian, Lineage 2). During evolution, this strain have been proposed to possess selective  
256 advantages, in contrast to other *M. tuberculois* lineages, which resulted in drug resistant TB  
257 outbreaks, increasing in population size especially in settings with distinct levels of TB  
258 incidence levels, rapid progression of disease after infection and unfavorable treatment

259 outcome (7, 18, 19, 30–33). These findings make it crucial to understand what deviations had  
260 been altered in genome of Beijing lineage during the evolution in comparison to other lineages,  
261 resulting in excessive virulence of the strain.

262 To gain insights, studies have been performed to find evolutionary markers specific to  
263 Lineage2 which resulted in identification of polymorphism in noise transfer function region  
264 (NTF) locus, mutT2 and mutT4 genes, in some strains named as modern beijing sub-lineages  
265 which were predicted to be more virulent than ancient or prototype Beijing lineages (6, 34–  
266 36). Moreover, other markers like mutation in hspX gene, deletion of *Rv0279c* in some beijing  
267 isolates gene and RD207 in all beijing isolates (*Rv2815c-Rv2820c*) were also interpreted (37,  
268 38). As, SNPs are consistent and phylogenetically useful markers, since the low sequence  
269 distinction and lack of horizontal gene transfer in *M. tuberculosis* make independent recurrent  
270 mutations unlikely (39). We thus used comparative genomics approach to provides insight into  
271 features of shared/ unique coding sequences across different lineages of *M. tuberculosis* (23).

272 As expected, the predicted core genome size of *M. tuberculosis* genome repertoire was 81% of  
273 total pan-genome size for hard core genome and 95% for soft core genome representing highly  
274 conserved nature of this bacterium. In order to determine extra genes that are added in each  
275 newly sequenced genome of *M. tuberculosis* we used the concept of open/closed pan-genome  
276 (40). We predicted *M. tuberculosis* genome taken in assortment as an “open” pan-genome (as  
277 the average number of genes with each new genome shows no sign of plateauing) which specify  
278 that each new genome sequenced will provide new/novel genes, and overall increase the size  
279 of pan-genome (16). These findings correlate with previous pan-genome finding performed on  
280 Mycobacterium species (41, 42) [39]. Although, this approach of determining “open” pan-  
281 genome is mathematical extrapolation from the available sequenced genomes, however, it  
282 supports the fact that some species have tremendously flexible genetic content (40). This  
283 open/finite pan-genome implies the number of distinct genes found in *M. tuberculosis* strains

284 is infinite as opposed to finite number of genes in a closed and thus increased emerging rate of  
285 drug resistance (**Fig 2 & Fig 3**) (41).

286 We found a major proportion of estimated CDS (in hard core genome) dedicated to metabolism  
287 [which consists of sequences mostly related with energy production and conversion (C), Amino  
288 acid transport and metabolism (E) and Lipid transport and metabolism (I)] (**Fig 4A & Fig 4B**).

289 This shows, that these sets of CDS in *M. tuberculosis* are conserved under selective pressure  
290 during its long-term interactions with its human host. The CDS associated with metabolic  
291 function may have major role in mycobacterial persistence, host pathogen struggle for  
292 nutrients, immune recognition and can be target for drug discovery [41] (**Warner, 2015**).

293 Average accessory genome sequences covered almost 15% of total genome repertoire, and  
294 functions of the CDS were mainly dedicated to category of poorly characterized or unknown  
295 function (S) followed by metabolism [coenzyme transport & metabolism (H)], and cellular  
296 processes & signaling [cell wall membrane envelope (M)] (**Fig 4A & Fig 4B**). Among the

297 poorly characterized CDS were mainly hypothetical proteins, PPE family protein, PE-PGRS  
298 family protein, PE family protein and mobile genetic elements. *M. tuberculosis* genomes  
299 containing PE/PPE family proteins have been reported as polymorphic having role in bacterial

300 virulence and advances have been used towards the expansion of these family proteins for  
301 vaccine development (43). With such strain diversity as observed in our genome assortment  
302 taken in our study among PE/PPE family proteins there are chances for negative vaccine  
303 effectiveness however, more studies are required to prove the statement (44) (McEvoy et al.,

304 2012). The accessory genome sequences may result in providing emergence of new functions,  
305 strain variations and understanding how it manages to survive in different niches, drug pressure  
306 which can give a reflection of its life style characteristic associated with virulence or resistance  
307 to antibiotics, it may be adapting during the course of evolution.

308 Unique genomic fractions were also observed in *M. tuberculosis* genomes, and were related to  
309 amino acid transport and metabolism (E), followed by Replication, recombination and repair  
310 (L) and Translation, ribosomal structure and biogenesis (J). These findings also provide  
311 information for the uptake of unique/novel genes in order to compensate the cost fitness due to  
312 antibiotic pressure. We observed majority of drug resistant *M. tuberculosis* genes were found  
313 in predicted hard-core genome except *pncA* (115/121 isolates). Thus, *pncA* gene mutations  
314 may have lower sensitivity in detection in 100% of *M. tuberculosis* strains and can be detected  
315 in a clear mainstream (>90%) of PZA-resistant strains, which has also been reported previously  
316 (45).

317 Our main findings during the pan-genome analysis in our collection of 121 *M. tuberculosis*  
318 genomes, we found CDS absent in modern Beijing lineage viz; CRISPR-associated  
319 endoribonuclease *cas2* (100%); CRISPR-associated endonuclease *cas1* (100%); CRISPR type  
320 III-a/*mtube*-associated protein *csm6* (100%) and CRISPR type III-a/*mtube*-associated ramp  
321 protein *csm4* (61.5%) respectively. However, we didn't find these deletions in two genomes of  
322 Lineage 2, these two strains have been reported as prototype Beijing like harboring an  
323 ancestral- spoligotype, which is close to the Beijing clade of East Asia lineage with SpolDb4  
324 international data base code as 246 and 643 (46). CRISPR-Cas system in *M. tuberculosis*  
325 associated with *Cas1* and *Cas2* genes perform endogenous DNA-repair along with a Type III  
326 A (CSM) effector arrangement, providing adaptive immunity to bacteriophages and plasmids.  
327 Deletion of the CRISPR-Cas system with associated *Cas1* and *Cas2* genes along with Type III  
328 A (CSM) among Beijing lineage strains could suggest more defective DNA-repair genes in  
329 such strains resulting in additional variability (47). This could predispose the lineage to  
330 development of drug resistance and transmission in the community. Such sequence markers  
331 could be useful in geographical regions where predominance of Beijing lineage is suspected.  
332 Beijing lineage that is vulnerable to first- and second-line TB drugs and has role in MDR-TB

333 transmission. We also validated the CRISPR sequences that we predicted to be deleted in  
334 modern Beijing lineages on lab isolates having different spoligotype patterns (**Table 4**) using  
335 conventional PCR method, which resulted in 100% sensitivity and specificity. This will  
336 facilitate molecular epidemiological studies and may contribute in the identification of virulent  
337 Beijing strains. Additional evidences including expression of cas1 and cas2 gene across *M.*  
338 *tuberculosis* lineages need to be verified to conclude that deletion of these genes lead to  
339 increased sensitivity to DNA damage resulting it in a potential phenotype mutator.

340 **Conclusion:** We conclude *M. tuberculosis* with an open pan-genome, presence of unique  
341 genome sequence fractions which may have significant role to persist in host, tolerating  
342 antibiotic pressure and developing drug resistance. Moreover, we found modern Beijing strains  
343 to have accessory sequences elements deleted which may have role in virulence and adaptation  
344 among these strains. Further, in-depth gene expression studies are required to understand the  
345 role of such sequences in Beijing Lineage.

346 **Acknowledgement:**

347 A fellowship to S.B.R. from the All India Institute of Medical Sciences, New Delhi, India  
348 (reference number P-2012/12452) is likewise acknowledged. This study was supported by a  
349 grant from the Department of Biotechnology of the Government of India  
350 (BT/538/NE/TBP/2013) and the Indian Council of Medical Research (5/8/5/41/2016/ECD-I).

351

352

353

354

355 **References:**

- 356 1. Lange C, Chesov D, Heyckendorf J, Leung CC, Udwadia Z, Dheda K. 2018. Drug-  
357 resistant tuberculosis: An update on disease burden, diagnosis and treatment.  
358 *Respirology* 23:656–673.
- 359 2. Sharma A, Hill A, Kurbatova E, van der Walt M, Kvasnovsky C, Tupasi TE, Caoili JC,  
360 Gler MT, Volchenkov GV, Kazenny BY, Demikhova OV, Bayona J, Contreras C,  
361 Yagui M, Leimane V, Cho SN, Kim HJ, Kliiman K, Akksilp S, Jou R, Ershova J,  
362 Dalton T, Cegielski P, Global Preserving Effective TB Treatment Study Investigators.  
363 2017. Estimating the future burden of multidrug-resistant and extensively drug-resistant  
364 tuberculosis in India, the Philippines, Russia, and South Africa: a mathematical  
365 modelling study. *The Lancet Infectious Diseases* 17:707–715.
- 366 3. Murase Y, Maeda S, Yamada H, Ohkado A, Chikamatsu K, Mizuno K, Kato S, Mitarai  
367 S. 2010. Clonal Expansion of Multidrug-Resistant and Extensively Drug-Resistant  
368 Tuberculosis, Japan. *Emerg Infect Dis* 16:948–954.
- 369 4. Jena L, Kashikar S, Kumar S, Harinath BC. 2013. Comparative proteomic analysis of  
370 *Mycobacterium tuberculosis* strain H37Rv versus H37Ra. *International Journal of*  
371 *Mycobacteriology* 2:220–226.
- 372 5. Ford CB, Shah RR, Maeda MK, Gagneux S, Murray MB, Cohen T, Johnston JC, Gardy  
373 J, Lipsitch M, Fortune SM. 2013. *Mycobacterium tuberculosis* mutation rate estimates  
374 from different lineages predict substantial differences in the emergence of drug resistant  
375 tuberculosis. *Nat Genet* 45:784–790.



- 376 6. Mokrousov I, Narvskaya O, Otten T, Vyazovaya A, Limeschenko E, Steklova L,  
377 Vyshnevskiy B. 2002. Phylogenetic reconstruction within *Mycobacterium tuberculosis*  
378 Beijing genotype in northwestern Russia. *Research in Microbiology* 153:629–637.
- 379 7. Thwaites G, Caws M, Chau TTH, D'Sa A, Lan NTN, Huyen MNT, Gagneux S, Anh  
380 PTH, Tho DQ, Torok E, Nhu NTQ, Duyen NTH, Duy PM, Richenberg J, Simmons C,  
381 Hien TT, Farrar J. 2008. Relationship between *Mycobacterium tuberculosis* Genotype  
382 and the Clinical Phenotype of Pulmonary and Meningeal Tuberculosis. *Journal of*  
383 *Clinical Microbiology* 46:1363–1368.
- 384 8. Glynn JR, Whiteley J, Bifani PJ, Kremer K, van Soolingen D. 2002. Worldwide  
385 Occurrence of Beijing/W Strains of *Mycobacterium tuberculosis*: A Systematic Review.  
386 *Emerg Infect Dis* 8:843–849.
- 387 9. Toungousova OS, Caugant DA, Sandven P, Mariandyshev AO, Bjune G. 2004. Impact  
388 of drug resistance on fitness of *Mycobacterium tuberculosis* strains of the W-Beijing  
389 genotype. *FEMS immunology and medical microbiology* 42:281–290.
- 390 10. Anh DD, Borgdorff MW, Van LN, Lan NTN, Gorkom T van, Kremer K, Soolingen D  
391 van. *Mycobacterium tuberculosis* Beijing Genotype Emerging in Vietnam - Volume 6,  
392 Number 3—June 2000 - *Emerging Infectious Diseases journal* - CDC  
393 <https://doi.org/10.3201/eid0603.000312>.
- 394 11. Iwamoto T, Yoshida S, Suzuki K, Wada T. 2008. Population structure analysis of the  
395 *Mycobacterium tuberculosis* Beijing family indicates an association between certain  
396 sublineages and multidrug resistance. *Antimicrobial Agents and Chemotherapy*  
397 52:3805–3809.

- 398 12. Baranov AA, Mariandyshev AO, Mannsåker T, Dahle UR, Bjune GA. 2009. Molecular  
399 epidemiology and drug resistance of widespread genotypes of *Mycobacterium*  
400 tuberculosis in northwestern Russia. *The International Journal of Tuberculosis and Lung*  
401 *Disease: The Official Journal of the International Union Against Tuberculosis and Lung*  
402 *Disease* 13:1288–1293.
- 403 13. Buu TN, Huyen MN, Lan NTN, Quy HT, Hen NV, Zignol M, Borgdorff MW, Cobelens  
404 FGJ, van Soolingen D. 2009. The Beijing genotype is associated with young age and  
405 multidrug-resistant tuberculosis in rural Vietnam. *The International Journal of*  
406 *Tuberculosis and Lung Disease: The Official Journal of the International Union Against*  
407 *Tuberculosis and Lung Disease* 13:900–906.
- 408 14. Rufai SB, Singh J, Kumar P, Mathur P, Singh S. 2018. Association of *gyrA* and *rrs* gene  
409 mutations detected by MTBDR sl V1 on *Mycobacterium tuberculosis* strains of diverse  
410 genetic background from India. 1. *Scientific Reports* 8:9295.
- 411 15. Iketleng T, Lessells R, Dlamini MT, Mogashoa T, Mupfumi L, Moyo S, Gaseitsiwe S,  
412 de Oliveira T. 2018. *Mycobacterium tuberculosis* Next-Generation Whole Genome  
413 Sequencing: Opportunities and Challenges. *Tuberc Res Treat* 2018.
- 414 16. Medini D, Donati C, Tettelin H, Maignani V, Rappuoli R. 2005. The microbial pan-  
415 genome. *Curr Opin Genet Dev* 15:589–594.
- 416 17. Ozer EA, Allen JP, Hauser AR. 2014. Characterization of the core and accessory  
417 genomes of *Pseudomonas aeruginosa* using bioinformatic tools Spine and AGent. *BMC*  
418 *Genomics* 15:737.
- 419 18. Liu W, Zou D, He X, Ao D, Su Y, Yang Z, Huang S, Zhao Q, Tang Y, Ma W, Lu Y,  
420 Wang J, Wang X, Huang L. 2018. Development and application of a rapid

- 421 Mycobacterium tuberculosis detection technique using polymerase spiral reaction. 1.  
422 Scientific Reports 8:3003.
- 423 19. Rufai SB, Singh S. 2019. Whole-Genome Sequencing of Two Extensively Drug-  
424 Resistant Mycobacterium tuberculosis Isolates from India. Microbiol Resour Announc  
425 8.
- 426 20. 1990. Molecular cloning: A laboratory manual. Second edition. Volumes 1, 2, and 3.  
427 Current protocols in molecular biology. Volumes 1 and 2: By J. Sambrook, E. F.  
428 Fritsch, and T. Maniatis. Cold Spring Harbor, New York: Cold Spring Harbor  
429 Laboratory Press. (1989). 1626 pp. \$115.00. Edited by F. M. Ausubel, R. Brent, R. E.  
430 Kingston, D. D. Moore, J. G. Seidman, J. A. Smith, and K. Struhl. New York: Greene  
431 Publishing Associates and John Wiley & Sons. (1989). 1120 pp. \$255.00. Cell 61:17–  
432 18.
- 433 21. Homer N, Merriman B, Nelson SF. 2009. BFAST: an alignment tool for large scale  
434 genome resequencing. PLoS One 4:e7767.
- 435 22. Manson AL, Cohen KA, Abeel T, Desjardins CA, Armstrong DT, Barry CE, Brand J,  
436 TBResist Global Genome Consortium, Chapman SB, Cho S-N, Gabrielian A, Gomez J,  
437 Jodals AM, Joloba M, Jureen P, Lee JS, Malinga L, Maiga M, Nordenberg D, Noroc E,  
438 Romancenco E, Salazar A, Ssengooba W, Velayati AA, Winglee K, Zalutskaya A, Via  
439 LE, Cassell GH, Dorman SE, Ellner J, Farnia P, Galagan JE, Rosenthal A, Crudu V,  
440 Homorodean D, Hsueh P-R, Narayanan S, Pym AS, Skrahina A, Swaminathan S, Van  
441 der Walt M, Alland D, Bishai WR, Cohen T, Hoffner S, Birren BW, Earl AM. 2017.  
442 Genomic analysis of globally diverse Mycobacterium tuberculosis strains provides  
443 insights into the emergence and spread of multidrug resistance. Nat Genet 49:395–402.

- 444 23. Ea O. 2018. ClustAGE: a tool for clustering and distribution analysis of bacterial  
445 accessory genomic elements. *BMC Bioinformatics* 19:150–150.
- 446 24. kSNP3.0: SNP detection and phylogenetic analysis of genomes without genome  
447 alignment or reference genome | *Bioinformatics* | Oxford Academic.
- 448 25. Letunic I, Bork P. 2019. Interactive Tree Of Life (iTOL) v4: recent updates and new  
449 developments. *Nucleic Acids Res* 47:W256–W259.
- 450 26. Huerta-Cepas J, Szklarczyk D, Forslund K, Cook H, Heller D, Walter MC, Rattei T,  
451 Mende DR, Sunagawa S, Kuhn M, Jensen LJ, von Mering C, Bork P. 2016. eggNOG  
452 4.5: a hierarchical orthology framework with improved functional annotations for  
453 eukaryotic, prokaryotic and viral sequences. *Nucleic Acids Res* 44:D286-293.
- 454 27. Tatusov RL, Natale DA, Garkavtsev IV, Tatusova TA, Shankavaram UT, Rao BS,  
455 Kiryutin B, Galperin MY, Fedorova ND, Koonin EV. 2001. The COG database: new  
456 developments in phylogenetic classification of proteins from complete genomes.  
457 *Nucleic Acids Res* 29:22–28.
- 458 28. Untergasser A, Cutcutache I, Koressaar T, Ye J, Faircloth BC, Remm M, Rozen SG.  
459 2012. Primer3—new capabilities and interfaces. *Nucleic Acids Research* 40:e115–e115.
- 460 29. Demay C, Liens B, Burguière T, Hill V, Couvin D, Millet J, Mokrousov I, Sola C,  
461 Zozio T, Rastogi N. 2012. SITVITWEB – A publicly available international  
462 multimarker database for studying *Mycobacterium tuberculosis* genetic diversity and  
463 molecular epidemiology. *Infection, Genetics and Evolution* 12:755–766.
- 464 30. Merker M, Blin C, Mona S, Duforet-Frebourg N, Lecher S, Willery E, Blum MGB,  
465 Rüsç-Gerdes S, Mokrousov I, Aleksic E, Allix-Béguec C, Antierens A,

- 466 Augustynowicz-Kopeć E, Ballif M, Barletta F, Beck HP, Barry CE, Bonnet M, Borroni  
467 E, Campos-Herrero I, Cirillo D, Cox H, Crowe S, Crudu V, Diel R, Drobniewski F,  
468 Fauville-Dufaux M, Gagneux S, Ghebremichael S, Hanekom M, Hoffner S, Jiao W,  
469 Kalon S, Kohl TA, Kontsevaya I, Lillebæk T, Maeda S, Nikolayevskyy V, Rasmussen  
470 M, Rastogi N, Samper S, Sanchez-Padilla E, Savic B, Shamputa IC, Shen A, Sng L-H,  
471 Stakenas P, Toit K, Varaine F, Vukovic D, Wahl C, Warren R, Supply P, Niemann S,  
472 Wirth T. 2015. Evolutionary history and global spread of the Mycobacterium  
473 tuberculosis Beijing lineage. 3. *Nature Genetics* 47:242–249.
- 474 31. Senghore M, Diarra B, Gehre F, Otu J, Worwui A, Muhammad AK, Kwambana-Adams  
475 B, Kay GL, Sanogo M, Baya B, Orsega S, Doumbia S, Diallo S, de Jong BC, Pallen MJ,  
476 Antonio M. 2020. Evolution of Mycobacterium tuberculosis complex lineages and their  
477 role in an emerging threat of multidrug resistant tuberculosis in Bamako, Mali. *Sci Rep*  
478 10.
- 479 32. Hang NTL, Maeda S, Keicho N, Thuong PH, Endo H. 2015. Sublineages of  
480 Mycobacterium tuberculosis Beijing genotype strains and unfavorable outcomes of anti-  
481 tuberculosis treatment. *Tuberculosis* 95:336–342.
- 482 33. Gagneux S, Small PM. 2007. Global phylogeography of Mycobacterium tuberculosis  
483 and implications for tuberculosis product development. *The Lancet Infectious Diseases*  
484 7:328–337.
- 485 34. Ebrahimi-Rad M, Bifani P, Martin C, Kremer K, Samper S, Rauzier J, Kreiswirth B,  
486 Blazquez J, Jouan M, van Soolingen D, Gicquel B. 2003. Mutations in putative mutator  
487 genes of Mycobacterium tuberculosis strains of the W-Beijing family. *Emerging*  
488 *Infectious Diseases* 9:838–845.

- 489 35. Marcos LA, Spitzer ED, Mahapatra R, Ma Y, Halse TA, Shea J, Isabelle M, Lapierre P,  
490 Escuyer VE. Mycobacterium orygis Lymphadenitis in New York, USA - Volume 23,  
491 Number 10—October 2017 - Emerging Infectious Diseases journal - CDC  
492 <https://doi.org/10.3201/eid2310.170490>.
- 493 36. Rindi L, Lari N, Cuccu B, Garzelli C. 2009. Evolutionary pathway of the Beijing  
494 lineage of Mycobacterium tuberculosis based on genomic deletions and mutT genes  
495 polymorphisms. Infect Genet Evol 9:48–53.
- 496 37. Seyed Majidi A, Bazzazi H, Zamani S, Ghaemi EA. 2020. Comparison of hspX gene  
497 sequence in the Beijing and non-Beijing Mycobacterium tuberculosis. Journal of  
498 Clinical Tuberculosis and Other Mycobacterial Diseases 21:100187.
- 499 38. Stavrum R, Valvatne H, Bø TH, Jonassen I, Hinds J, Butcher PD, Grewal HMS. 2008.  
500 Genomic Diversity among Beijing and non-Beijing Mycobacterium tuberculosis  
501 Isolates from Myanmar. PLOS ONE 3:e1973.
- 502 39. Jones RC, Harris LG, Morgan S, Ruddy MC, Perry M, Williams R, Humphrey T,  
503 Temple M, Davies AP. 2019. Phylogenetic Analysis of Mycobacterium tuberculosis  
504 Strains in Wales by Use of Core Genome Multilocus Sequence Typing To Analyze  
505 Whole-Genome Sequencing Data. Journal of Clinical Microbiology 57.
- 506 40. Guimarães LC, Florczak-Wyspianska J, de Jesus LB, Viana MVC, Silva A, Ramos RTJ,  
507 Soares S de C, Soares S de C. 2015. Inside the Pan-genome - Methods and Software  
508 Overview. Curr Genomics 16:245–252.
- 509 41. Periwal V, Patowary A, Vellarikkal SK, Gupta A, Singh M, Mittal A, Jeyapaul S,  
510 Chauhan RK, Singh AV, Singh PK, Garg P, Katoch VM, Katoch K, Chauhan DS,  
511 Sivasubbu S, Scaria V. 2015. Comparative Whole-Genome Analysis of Clinical Isolates

- 512 Reveals Characteristic Architecture of Mycobacterium tuberculosis Pangenome. PLoS  
513 One 10.
- 514 42. Yang T, Zhong J, Zhang J, Li C, Yu X, Xiao J, Jia X, Ding N, Ma G, Wang G, Yue L,  
515 Liang Q, Sheng Y, Sun Y, Huang H, Chen F. 2018. Pan-Genomic Study of  
516 Mycobacterium tuberculosis Reflecting the Primary/Secondary Genes,  
517 Generality/Individuality, and the Interconversion Through Copy Number Variations.  
518 Front Microbiol 9.
- 519 43. Campuzano J, Aguilar D, Arriaga K, León JC, Salas-Rangel LP, González-y-Merchand  
520 J, Hernández-Pando R, Espitia C. 2007. The PGRS domain of Mycobacterium  
521 tuberculosis: PE\_PGRS Rv1759c antigen is an efficient subunit vaccine to prevent  
522 reactivation in a murine model of chronic tuberculosis. Vaccine 25:3722–3729.
- 523 44. McEvoy CRE, Cloete R, Müller B, Schürch AC, van Helden PD, Gagneux S, Warren  
524 RM, Gey van Pittius NC. 2012. Comparative analysis of Mycobacterium tuberculosis ppe  
525 and ppe genes reveals high sequence variation and an apparent absence of selective  
526 constraints. PLoS One 7:e30593.
- 527 45. Werngren J, Alm E, Mansjö M. 2017. Non-pncA Gene-Mutated but Pyrazinamide-  
528 Resistant Mycobacterium tuberculosis: Why Is That? Journal of Clinical Microbiology  
529 55:1920–1927.
- 530 46. Kuan CS, Chan CL, Yew SM, Toh YF, Khoo J-S, Chong J, Lee KW, Tan Y-C, Yee W-  
531 Y, Ngeow YF, Ng KP. 2015. Genome Analysis of the First Extensively Drug-Resistant  
532 (XDR) Mycobacterium tuberculosis in Malaysia Provides Insights into the Genetic  
533 Basis of Its Biology and Drug Resistance. PLoS One 10.

534 47. Freidlin PJ, Nissan I, Luria A, Goldblatt D, Schaffer L, Kaidar-Shwartz H, Chemtob D,  
535 Dveyrin Z, Head SR, Rorman E. 2017. Structure and variation of CRISPR and CRISPR-  
536 flanking regions in deleted-direct repeat region Mycobacterium tuberculosis complex  
537 strains. BMC Genomics 18:168.

538

539

540

541

542



543

544

545

546

547 **Table 1. Estimation of hard-core, soft-core and accessory sequence elements of 121 MTB**  
 548 **genomes.**

| Core genome characteristics | Shared amongst 100% of the genome |                                  | Shared among $\leq 90\%$ of genome |                                  |
|-----------------------------|-----------------------------------|----------------------------------|------------------------------------|----------------------------------|
|                             | Core genome Average (range)       | Accessory genome Average (range) | Core genome Average (range)        | Accessory genome Average (range) |
| Size (bp)                   | 3683161<br>(3672229-3751588)      | 696320.9<br>(461308-742152)      | 4308602<br>(4213348-44055935)      | 93819.7<br>(32024-135709)        |
| GC content                  | 65.1                              | 67.9                             | 65.5                               | 71.7                             |
| Number of sequence segments | 939<br>(894-1053)                 | 936.3<br>(847-1116)              | 115<br>(112-658)                   | 121.8<br>(47-219)                |
| Maximum segment length      | 27136<br>(26906-33160)            | 3059.4<br>(15015-27765)          | 211154<br>(57005-377999)           | 7391.4<br>(290.2-15599)          |
| Avg. segment length         | 3922.4<br>(3562.7-4170.6)         | 745.6<br>(544.6-8224.4)          | 37466.1<br>(6320-38375)            | 778.4<br>(331.4-1026.7)          |
| Median length               | 2558<br>(2231-2746)               | 220.2<br>(179-253)               | 18237<br>(2599-20222)              | 289.6<br>(71-4400)               |
| No. of CDS                  | 3698<br>(3438-4173)               | 539.3<br>(443-629)               | 4237<br>(3887-4718)                | 57.6<br>(20-88)                  |

549 <sup>a</sup>Core genome present in 100% of genomes

550 <sup>b</sup>Core genome present in  $\leq 90\%$  of geno

**Table 2.** Showing Sequence elements of CRISPR-associated endo-ribonuclease cas2 (*Rv2816c*); CRISPR-associated endonuclease cas1 (*Rv2817c*); CRISPR type III-a/mtube-associated protein csm6(*Rv2818c*); CRISPR type III-a/mtube-associated protein csm5 (*Rv2819c*) and CRISPR type III-a/mtube-associated ramp protein csm4 (*Rv2820c*) deleted among modern Beijing lineage taken in assortment for pangenome analysis.

| Gene name                   | Nucleotide sequences deleted in modern beijing lineage                                                                                                                                                                                                                                                                                                                                                                                                                                                                                                                                                                                                                                                                                                                                                                                                                                                                                                                                                                                                                                                                                                                                    |
|-----------------------------|-------------------------------------------------------------------------------------------------------------------------------------------------------------------------------------------------------------------------------------------------------------------------------------------------------------------------------------------------------------------------------------------------------------------------------------------------------------------------------------------------------------------------------------------------------------------------------------------------------------------------------------------------------------------------------------------------------------------------------------------------------------------------------------------------------------------------------------------------------------------------------------------------------------------------------------------------------------------------------------------------------------------------------------------------------------------------------------------------------------------------------------------------------------------------------------------|
| Rv2817c (Complete deletion) | <p>atggtgcagctgtatgtctcgactccgtgtcgcggatcagctttgccgacggccgggtgatcgtgtggagcagggagctcggcgagagccagatccgatcgagacgctggacg<br/> gcatcacgctgttggcgccgacgatgacaacgccctcatcgttgagatgtcaagcgtgagcgcgacatccagctcttcacgaccgacggccactaccagggccgatctca<br/> acaccgacgtgtacacgcgccggtccgtcagcaagttcaccgacccgacgatcctgcgttctgctgtcgttaagcaagcggatcgtgtcgaggaagatcctgaatcagca<br/> ggccttgattcgggcacacacgtcggggcaagacgttgctgagagcatccgcacgatgaagcactcgtggcctgggtcgtatcgggctccctggcggagtgaacgggttc<br/> gagggaaatgcccaaaggcatactcaccgcgctggggcatctcgtcccgcaggagttcgattccaggccgctcactcggccgcttgagcgccttaactcgtatggtca<br/> gcctcggctattcgtcgtgtacaagaacatcatagggcgatcgagcgtcacagcctgaacgcgtatcgtttcctacaccaggattcacagggcgacgcaactgtggcgagc<br/> gacctatggaggtatggcggcgccgatcatcgtatgacaccgactctcgtatgacggacgggtgtgtcgcacccggccttcagcaagaactccgacacggggccgcttt<br/> cgcgacacgggaagccacacgatccatcgcgcgcctttgtaatgaatgcacgaaccgccctacataaaggcgatcctcaccgatacacctttcagtagccctcgtact<br/> tgcaactgcaaagcctcgtgcgtgttatcgaagccgggcaccgctcgcggctcgtcgatcgtatcacctccgagccatccggagcctaa</p>                                                                                                                           |
| Rv2816c (complete deletion) | <p>Atgccactcgcagccgtgaggagtacttcaatctcccgtcaaagtggacgagtcacggcactataggcaagatgttcgtcctcgtaatatacgacatcagcgacaaccggcg<br/> gccccgttcaacttgcgaagatcctggccgggttgctatcgcgtccaagagtcggcattcgaagcgtatgctgacgaagggccagctcgcgaaactagttgcacgtatcaccgctt<br/> cgccatcgactcgcacaacatccggatctataagataagaggtgttgccgagttacgttctacggaaggggacggcttgcagcgcagaggagttgtgtctttga</p>                                                                                                                                                                                                                                                                                                                                                                                                                                                                                                                                                                                                                                                                                                                                                                                                                           |
| Rv2818c (complete deletion) | <p>Gtgctattctcagcggagatagctgctttgagaacgcggaccggcggtactccggcgaatcacgggctcgcgctgagaccgacgttcgatagtcacctataccaacc<br/> cgtcgggtgcacaggttcgacctttcgtccggtttccgcaaccactggttgaactgtcggctgagttccctgatcgaaccatttctgtaataccagttccggcaccctcgcgatgc<br/> aggcggcgctggtggccataaatgtgttggcattcccaggaccaccgctgtgcaagtaagcagcgcctcccgggcattgagcaagcctggcgtcgtgaatcccagacgcttac<br/> gacctgaaactaatgtgggacgcaaacgacgacaatcagcctggagcccccaaccgttgcctttgagggcactccgctcgcgctcggcgcgctgcttgcgggccaacctgaagc<br/> agctgatcgtgtcgtactcggcagcagtgacgatcggcgagactcgcgctcccgatcaagtgagcaatctgatccggcgcgatgcaccgctcagggctggaaca<br/> cctcgtagcgccaaagtcttaaggacaccgcgttcacgtatgaccccgcaacaagtgctgctgagfataaagtcttgcgctgctggcaaacgcgagcaatgggctgaatt<br/> cgcacgatcagctacccggcaatcactatcgtgctcagggcggtgtggcaaacacctccggaggaccgctatctcagcagatggccgctcaccgcccgaagctgga<br/> aagagagccggagataggtgcgcgctcaagcaccctccgaaatcgcaaacgcggagtgtacctctacccaaggactggctcgcactgctccgcaatcgcaccgatcg<br/> agttggtgcttgaagtactcggaggttcgagagccgggtccgcaaccgcagcacagatcgtctcaatcagtgaggatcgcacgaaggtggcggccttctcccag<br/> aacaactgctgaagatcctcggcgaaacaggcgctgatttgacgctctatgaccggttgaacgacgagatcaccggcagattgatatggcaccgctgggctaa</p> |

|                                     |                                                                                                                                                                                                                                                                                                                                                                                                                                                                                                                                                                                                                                                                                                                                                                                                                                                                                                                                                                                                                                                                                                                                                |
|-------------------------------------|------------------------------------------------------------------------------------------------------------------------------------------------------------------------------------------------------------------------------------------------------------------------------------------------------------------------------------------------------------------------------------------------------------------------------------------------------------------------------------------------------------------------------------------------------------------------------------------------------------------------------------------------------------------------------------------------------------------------------------------------------------------------------------------------------------------------------------------------------------------------------------------------------------------------------------------------------------------------------------------------------------------------------------------------------------------------------------------------------------------------------------------------|
| Rv2819 (complete deletion)          | <p>Atgaacacctactgaagccgtcgaactcacgctgcgggtgcctggggccggtgtttatcggatccggcgagaagcggacctcgaaggagtaccacgtggagggcgaccgggtctacttccggacatggaactctttacgcagacattccggctcacaagaggaaagtctttcgaagcgttcgtcatgaacaccgatggggcacaggcgacggcgccactcaaagagtggttagaccaaacgcggtaagctggtatcctgtaagcatcgaggttacgaggtgaagatcgggtcgtcgaaccgcgacgtgcatctcgtggcgaaggcggcgcatgactcgaagaagcttacgctcaacgagattcacgctttcatcaagaccctcttgaaggccctactgcccgggttcgactgtcaagggaatgcttcgcagcatctacctgcagtcgcttgcataaagcggacggccaacgttctgttccgggacaccagacgcgggagcaccggcagctacggcgaaaggtttgagcgggaaggagttgcgaaatcggggcgcccaacacccgtccgaagacgcggtaacgacctgttcaggcgtacagggtcaccgactcacctgcaactgagaacaagcgtatgctgatctgccagaagatggacatgaatgtccacggcaagcctgatggcctgcgctctccgggaatgtttggcggcgggaacctcaatcgcaccgcgtggtggtcgaaccagctcccaccgctcggcgggctggcgtgagggcgagcggttcctgaaacgctggccgagacagccgctccgtgaaatcaggcgcgttacgggagctacagagccatgtaccctggcgtgaacgcgatagttggcccaattgtctatctggcggcgagccggctatcggagcaagaccttgcaccgaccaagacgacatggcgaaggtgctcgcagcccagttcgggaaggtagtcaagcacgtcacaagacgcgcgaaactacgcgtcaccactgtctgaagcgaaccaagatcgacaacatatgtacgagatgggtcagtcgagctgctgatcaggagagccgaatga</p> |
| Rv2820 (partial deletion 355-901bp) | <p>atgaactcgcggctgttaggttcgacttcgaccgcacacattcggcgaccacggcctcagctcgtccacgattagctgccccgcggacacctctactctgcgtttgcgttgaagcgtacggatgggtggccagcagctgcttggcgaactcgttcgctcgcacgctcgggtgaccgatctgctgccctatgtggggcccgattacctggtccaagcccctgcacagcgttcggtcgacggctcaagtatgcagaagaagctggcgaagaagatcggctttctcccgtgccccagcttggcagcttctcgtatggcacggccgacctgaaagaactcggcgcggcagaccaagatcgggtgccacgccgtgtcagcgaaggcagcgtccacaacggaaagaaagacgccgacccgtaccgtgtcggctactccgggtcagctggacgggtctgtggttgcggcaccggatccgagctcggcctactaccaggctgttgaagggatctccgcgctggcgggcgaacggacaagcgggttcggagcgttfaacctaccgagtcagaagcaccggcgcactcacgccacagtcgacggccagctcgtacgctcacgacatccctaccacggacgacgagctcgaagccgactcggcgcgacgtaccgcctcgtcaagcgcagtgattcgtcgcgtcagcacatacgtgacatgcccctcgcgaaacgcgacatctacaaa]ttcggcgccgctcgttcttcgcgaccc</p> <p>ttccaaggaggcatcctcgcagctcggcggaaccatccggtctacagctacgcgcaccgctatttctgcactcccggagtccggccatga</p>                                                                                                                                                                                                                                          |

\*The portion of the gene that is present in bin32\_se00001( clustAge software generates small bins of accessory sequences please refer software for detailed information (23) is from nucleotide bases 351 through 909 which was found to be deleted in Beijing lineage.

**Table 3. List of primers designed against CRISPR genomic elements using Primer 3 software**

| <b>Gene region</b>                                   | <b>Primer</b> | <b>Length</b> | <b>Tm</b> | <b>Sequence size</b> | <b>GC%</b> | <b>Sequence</b>       | <b>Product size (bp)</b> |
|------------------------------------------------------|---------------|---------------|-----------|----------------------|------------|-----------------------|--------------------------|
| CRISPR-associated endonuclease cas2                  | Left Primer   | 20            | 60.76     | 342                  | 55         | GCGGCACTATAGGCAAGATG  | 229                      |
|                                                      | Right Primer  | 20            | 59.76     |                      | 50         | ACTGCCGCAACACCTCTTAT  |                          |
| CRISPR-associated endonuclease cas1                  | Left Primer   | 19            | 59.57     | 1017                 | 57.89      | GCTCCGTCAGCAAGTTCAC   | 494                      |
|                                                      | Right Primer  | 21            | 60.01     |                      | 47.62      | CGATCAATCGAAGTACGGTGT |                          |
| CRISPR type III-a/mtube-associated protein csm6      | Left Primer   | 20            | 60.79     | 1149                 | 50         | GCTGGTGGCCATAAATGTGT  | 812                      |
|                                                      | Right Primer  | 20            | 59.55     |                      | 50         | TCAGCAGTTGTTCTGGGAGA  |                          |
| CRISPR type III-a/mtube-associated ramp protein csm5 | Left Primer   | 20            | 59.41     | 1128                 | 55         | CTACTTCCCGGACATGGAAC  | 848                      |
|                                                      | Right Primer  | 20            | 60.55     |                      | 55         | GGTCGGTGACAAAGGTCTTG  |                          |
| CRISPR type III-a/mtube-associated ramp protein csm4 | Left Primer   | 19            | 59.75     | 909                  | 57.89      | GGCCGACCTGAAAGAACTC   | 483                      |
|                                                      | Right Primer  | 18            | 60.35     |                      | 61.11      | AAGGGTCGCGAGAAGACC    |                          |



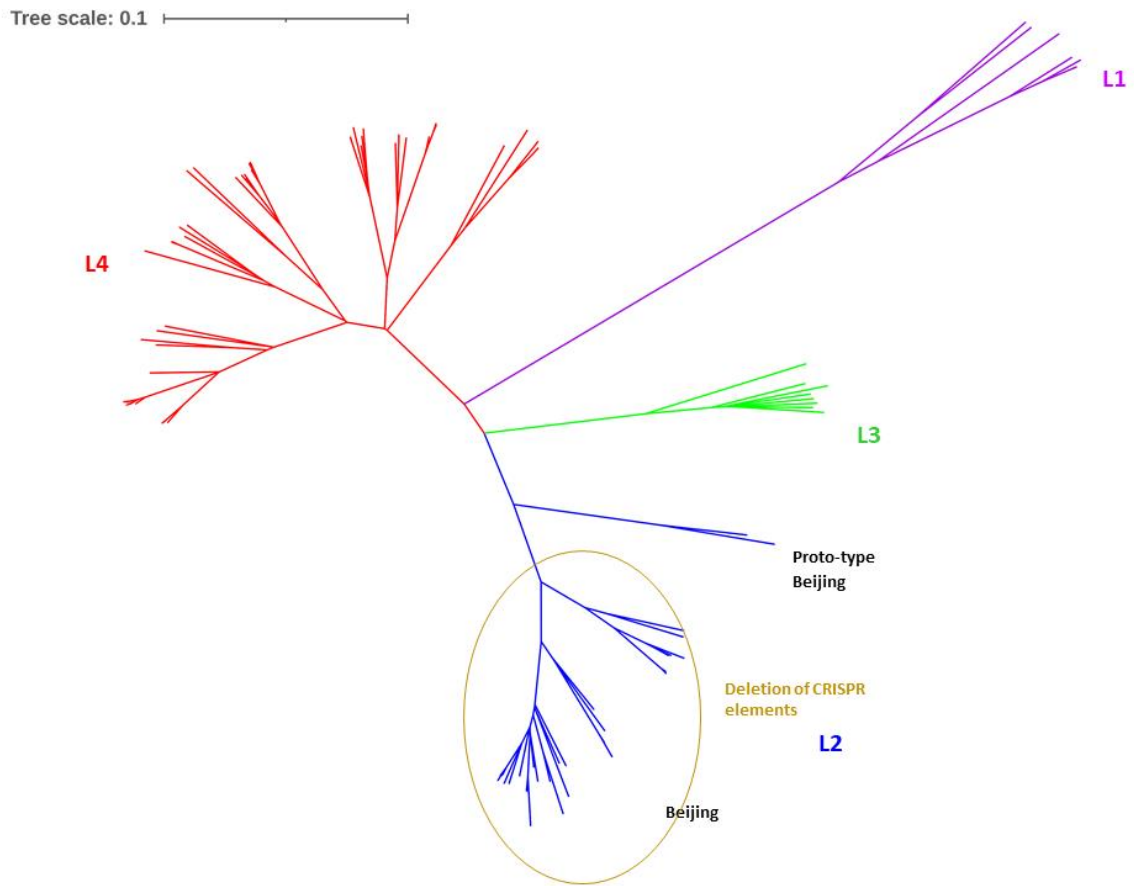

**Fig. 1** Evolutionary parsimony tree was constructed by extended Majority Rule consensus using KSNP3.0. The tree shows four distinct lineages among 121 MTB isolates. Briefly, Purple lines represent clades belonging to Lineage 1 (Indian Oceanic); Blue lines represent clades belonging to Lineage 2 [East Asian (Beijing 40; proto-type Beijing 2)]; Green lines represent clade belonging to Lineage 3 (Central Asian); Red lines represent Lineage 4 (Euro-American).

## New Genome

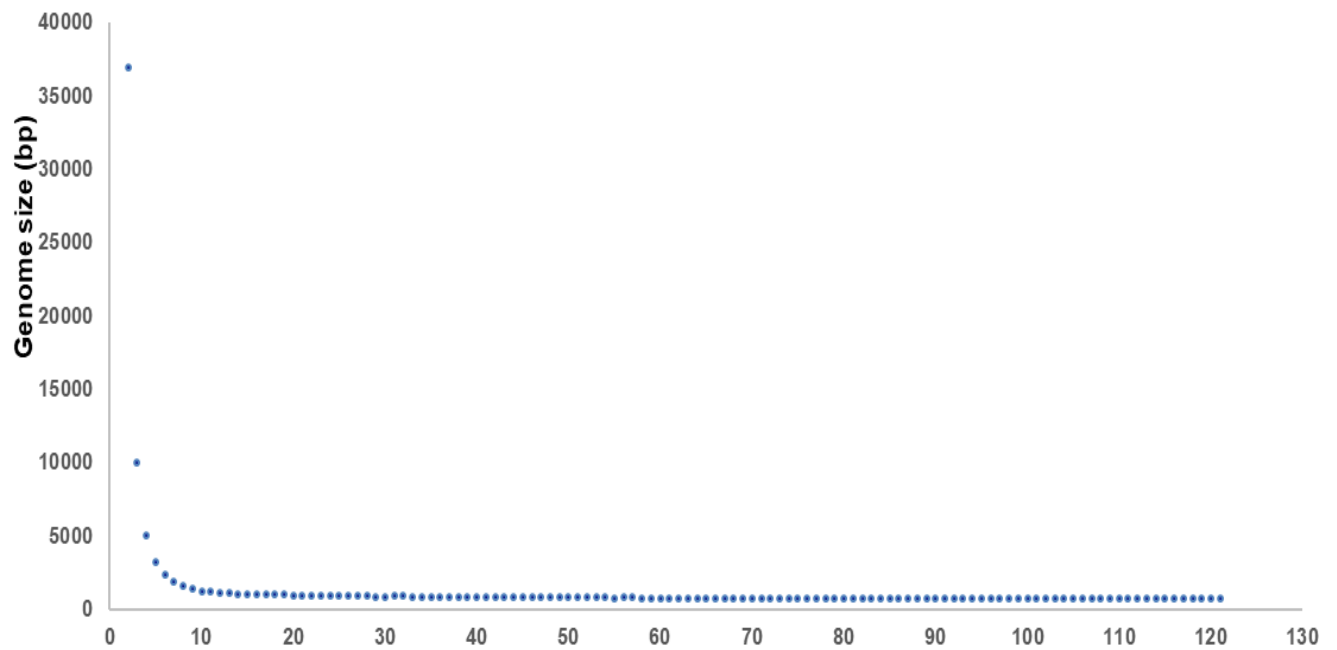

**Fig 2.** Representation of Core-Pan plot. Each marker represents the average core genome and pan-genome size of all possible permutations of genome orders for one hundred twenty for 10,000 randomly generated permutations adapted from *Tettelin et al., 2005* generated from Spine software.

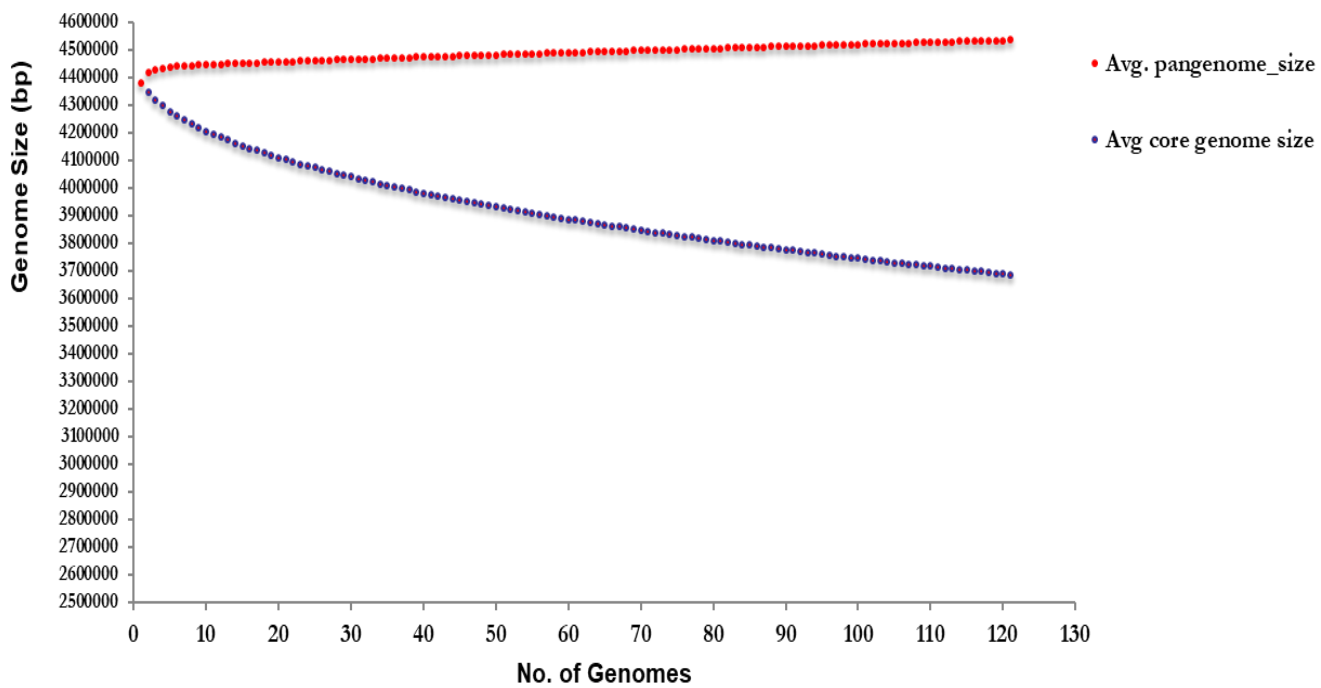

**Fig. 3.** New genome size of genome orders for one hundred twenty-one for 10,000 randomly generated permutations.



Fig. 4A

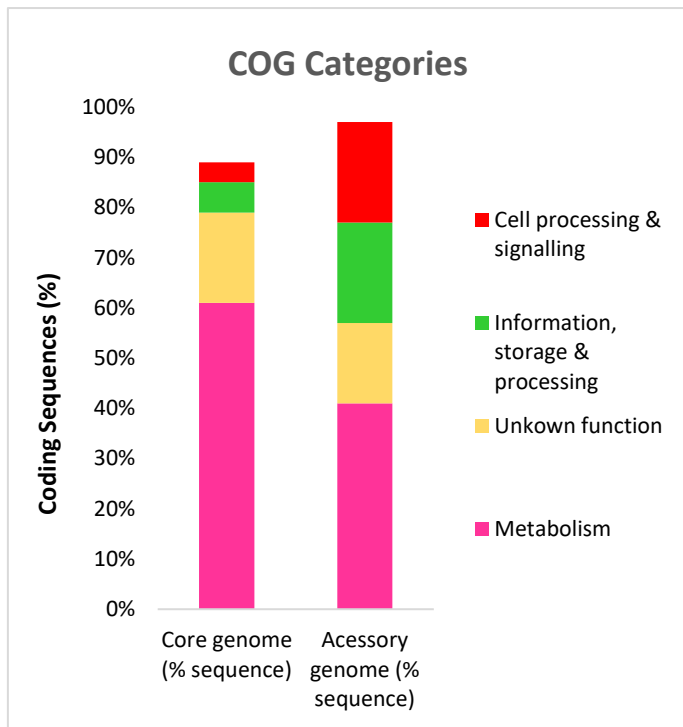

Fig. 4B

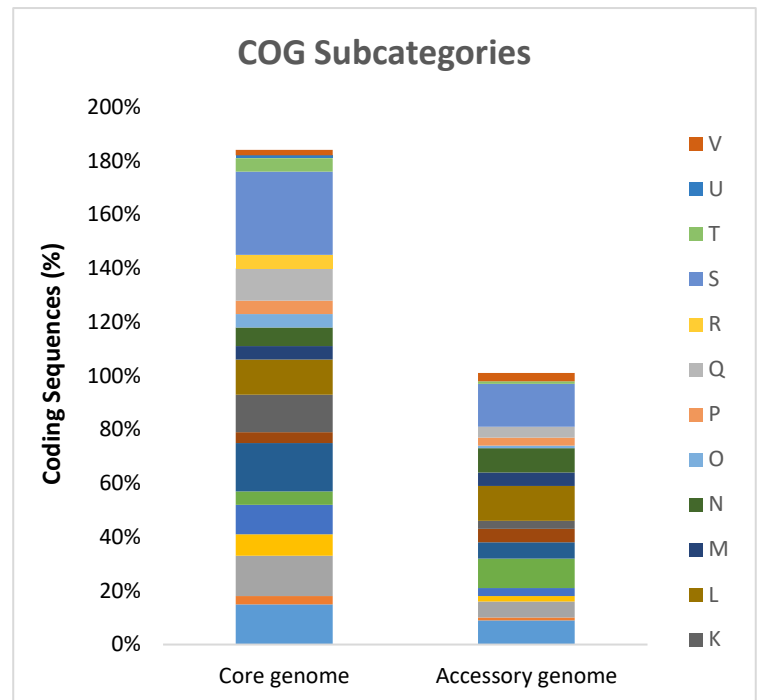

**Fig.4a** Functional annotations of core and accessory genes (A) COG categories **Fig. 4b(B)** COG subcategories of predicted genes within the core and accessory genomes of *M. tuberculosis* genomes by eggNOG Mapper v2.0. Each category or subcategory is graphed as a percentage of the total number of genes in the core or accessory genomes.

Sub-categories abbreviations include;

- Cellular processes and signaling {[D] Cell cycle control, cell division, chromosome partitioning, [M] Cell wall/membrane/envelope biogenesis, [N] Cell motility, [O] Post-translational modification, protein turnover, and chaperones, [T] Signal transduction mechanisms, [U] Intracellular trafficking, secretion, and vesicular transport [V] Defense mechanisms [W] Extracellular structures [Y] Nuclear structure [Z] Cytoskeleton}
- Information storage & processing {[A] RNA processing and modification [B] Chromatin structure and dynamics [J] Translation, ribosomal structure and biogenesis [K] Transcription [L] Replication, recombination and repair}
- Metabolism {[C] Energy production and conversion [E] Amino acid transport and metabolism [F] Nucleotide transport and metabolism [G] Carbohydrate transport and metabolism [H] Coenzyme transport and metabolism [I] Lipid transport and metabolism [P] Inorganic ion transport and metabolism [Q] Secondary metabolites biosynthesis, transport, and catabolism} poorly characterized [R] General function prediction only [S] Function unknown

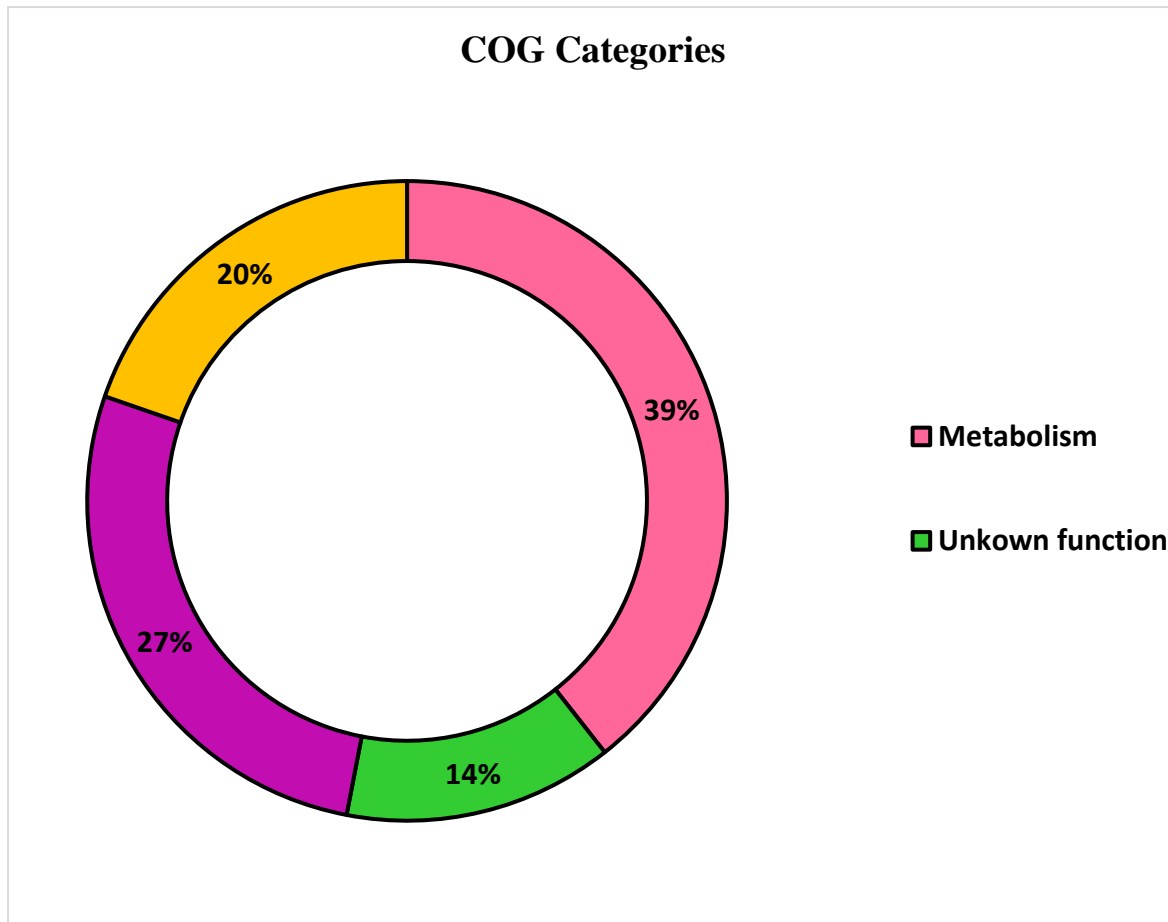

**Fig 5.** Functional annotations of unique gene COG categories of *M. tuberculosis* genomes by eggNOG Mapper v2.0.

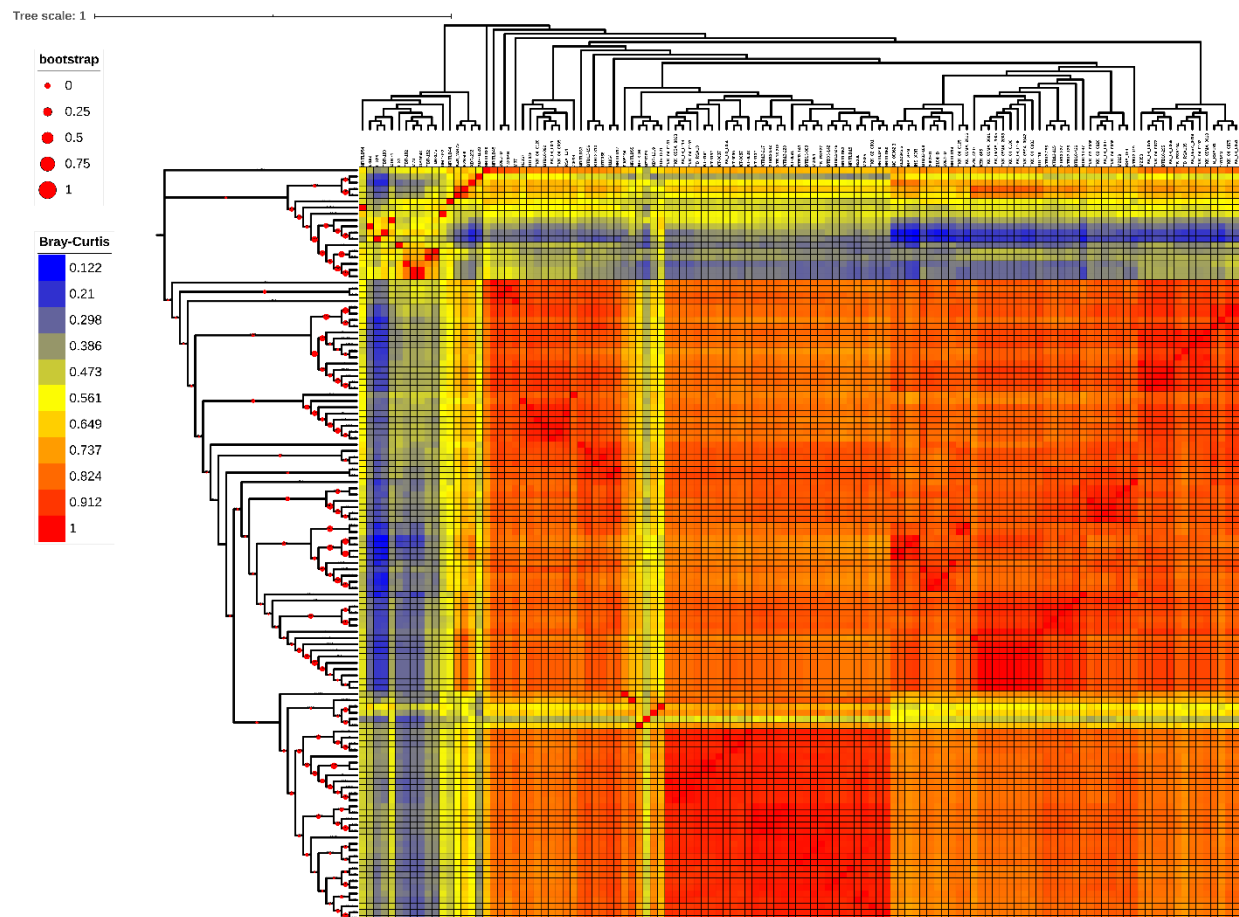

**Fig.6** Neighbor joining tree and heat map generated by ClustAGE software showing distribution of accessory elements across 121 *M. tuberculosis* genomes.

Neighbor joining tree and heat map of accessory element distribution patterns was calculated using Bray-Curtis distance matrix by ClustAGE software from distributions of accessory elements. Tree and heat map files were viewed iTOL (<https://itol.embl.de>)

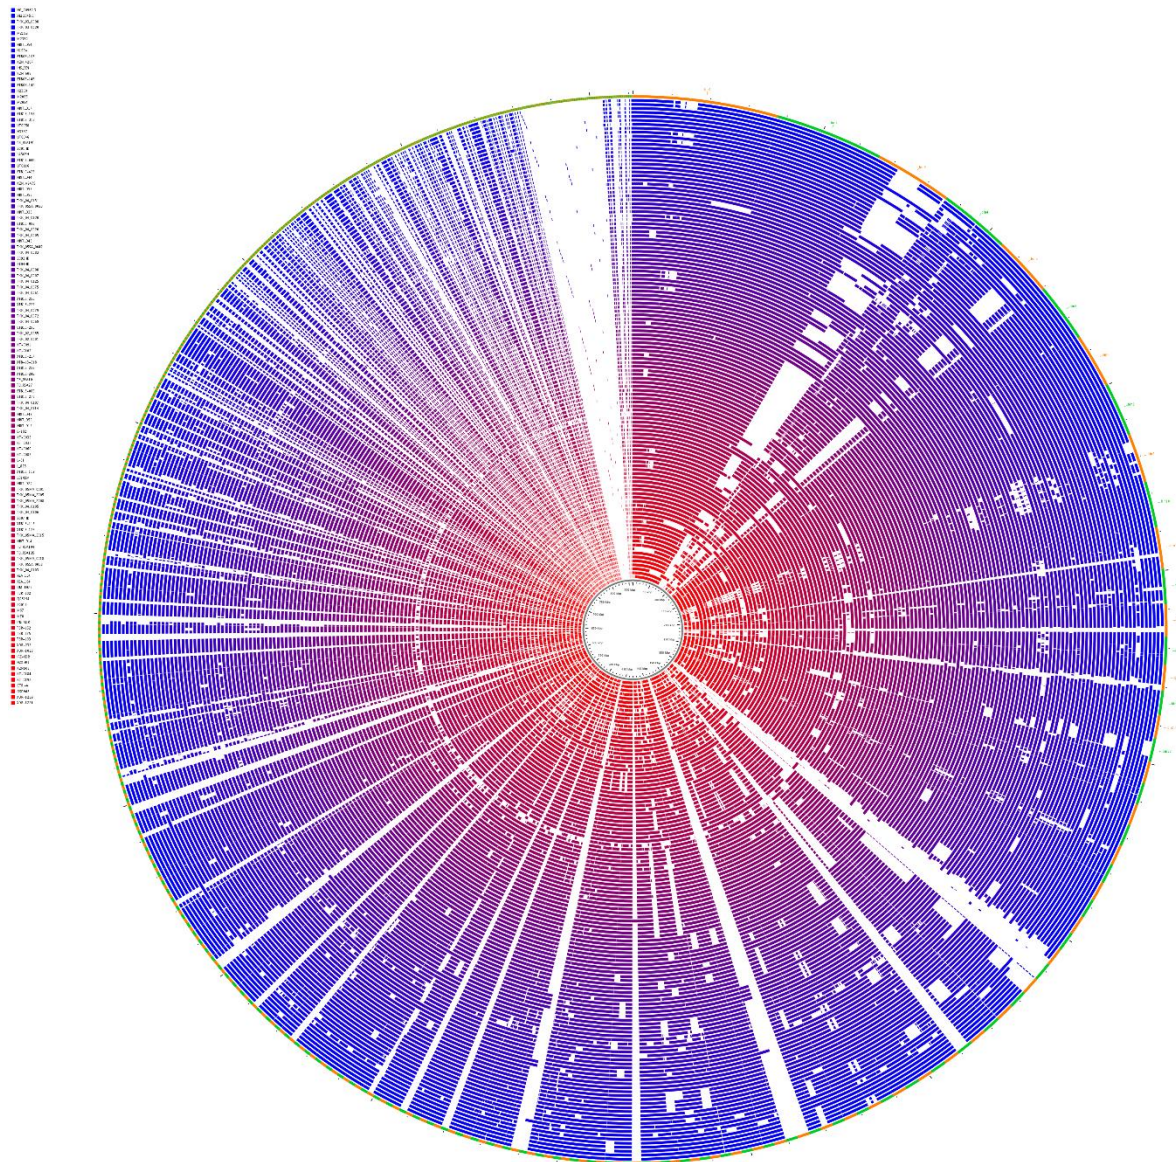

**Fig. 7A.** ClustAGE plot Sharing of accessory sequences present in all 121 MTB strains (100% core)

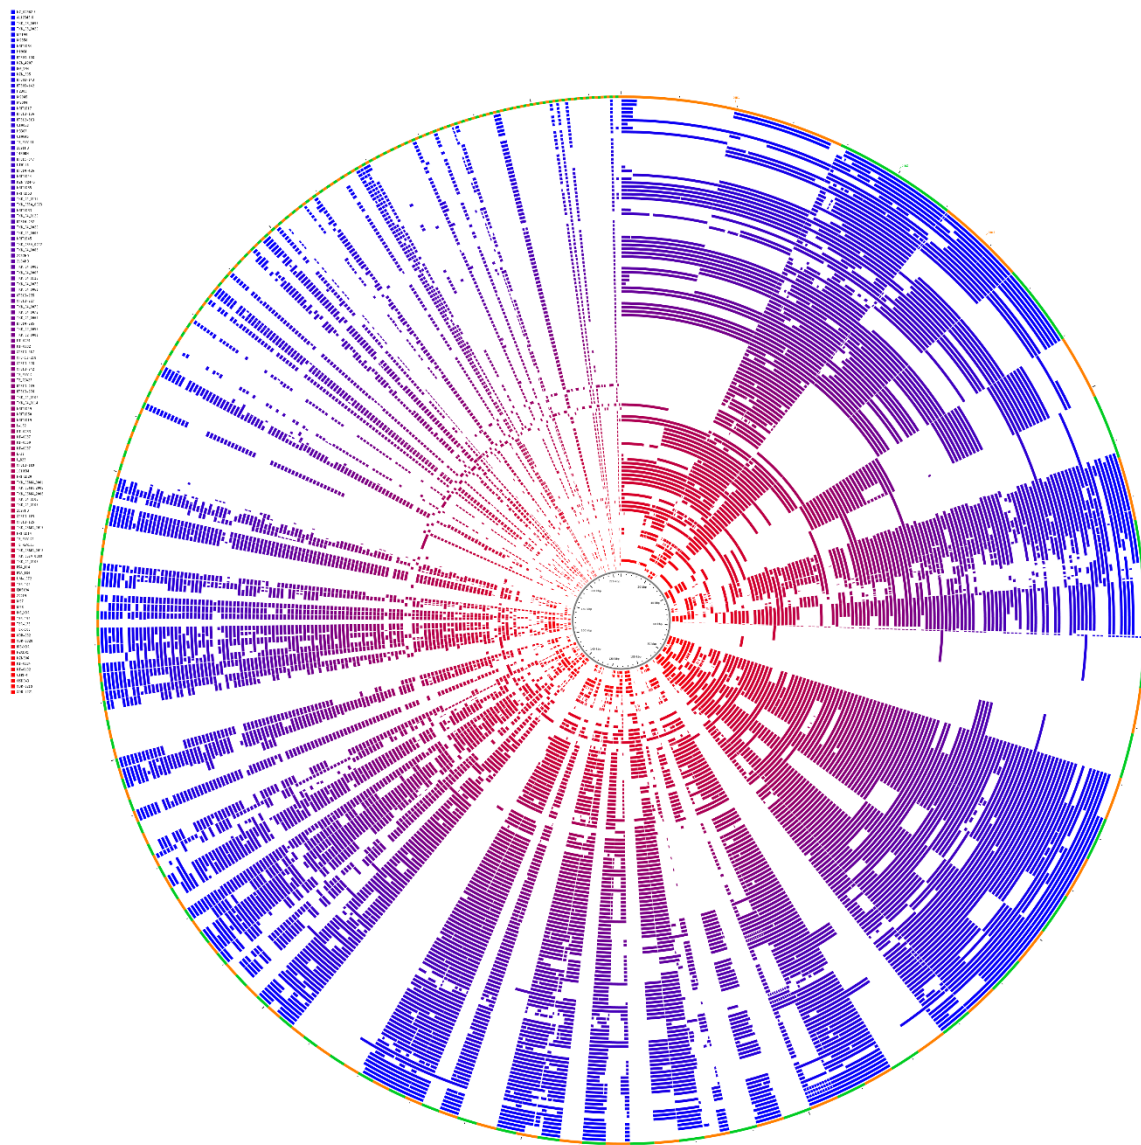

**Fig. 7B.** ClustAGE plot Sharing of accessory sequences of sequences or and in  $\geq \leq 110$  MTB strains (90%)

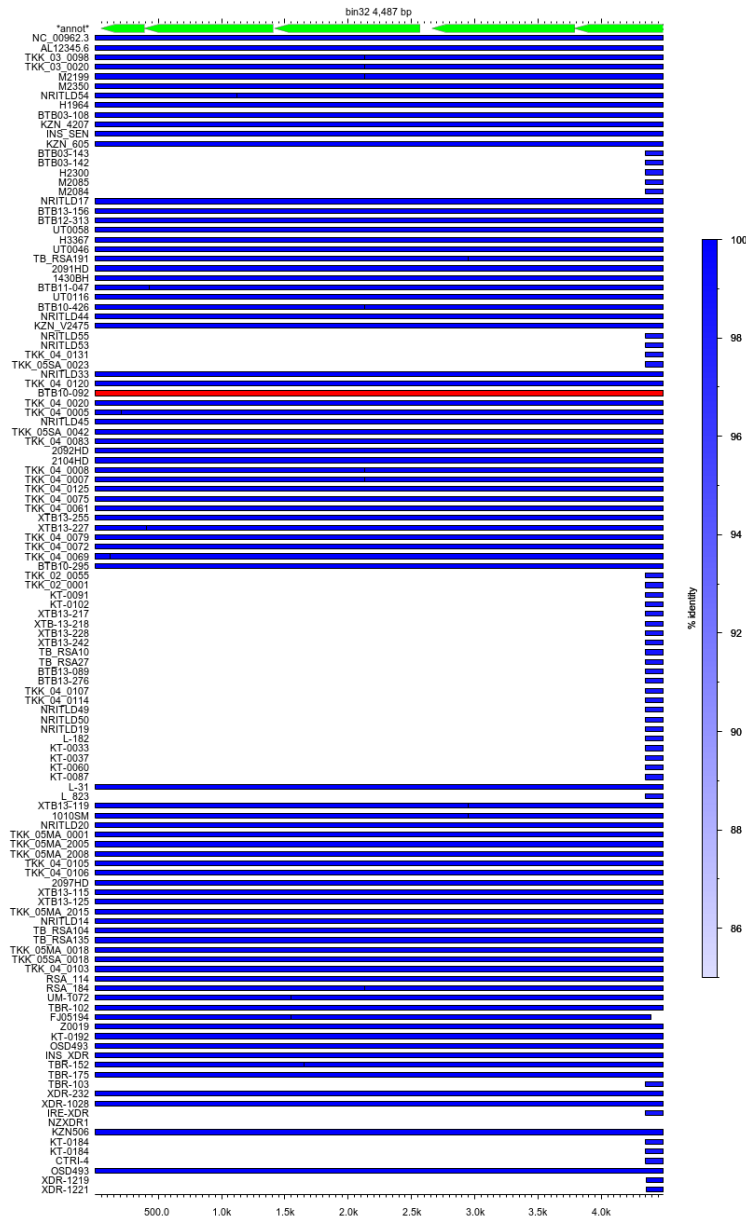

**Fig 8.** AGE graph output showing Bin 32; total size 4487 bp segment, completely deleted sequences in Beijing lineage are CRISPR-associated endo-ribonuclease *cas2* (*Rv2816c*); CRISPR-associated endonuclease *cas1* (*Rv2817c*); CRISPR type III-a/mtube-associated protein *csm6* (*Rv2818c*); CRISPR type III-a/mtube-associated ramp protein *csm5* (*Rv2819c*) and partially deleted CRISPR type III-a/mtube-associated ramp protein *csm4* (61.5%) respectively

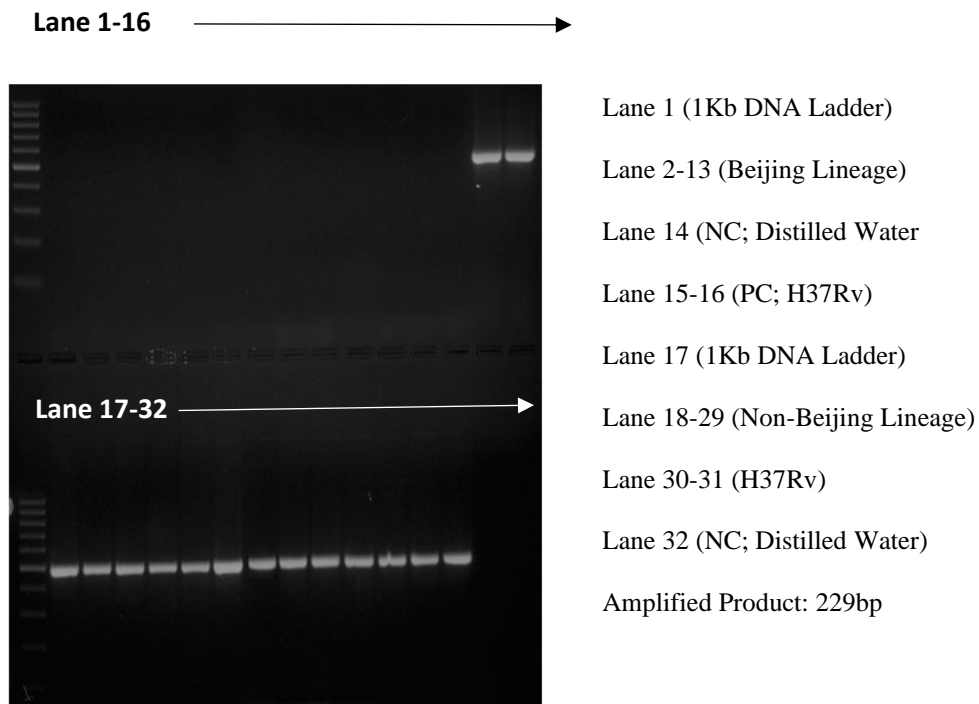

Fig. 9A Representation pic showing CRISPR Cas2 (*Rv2816c*) sequence elements deleted in Beijing

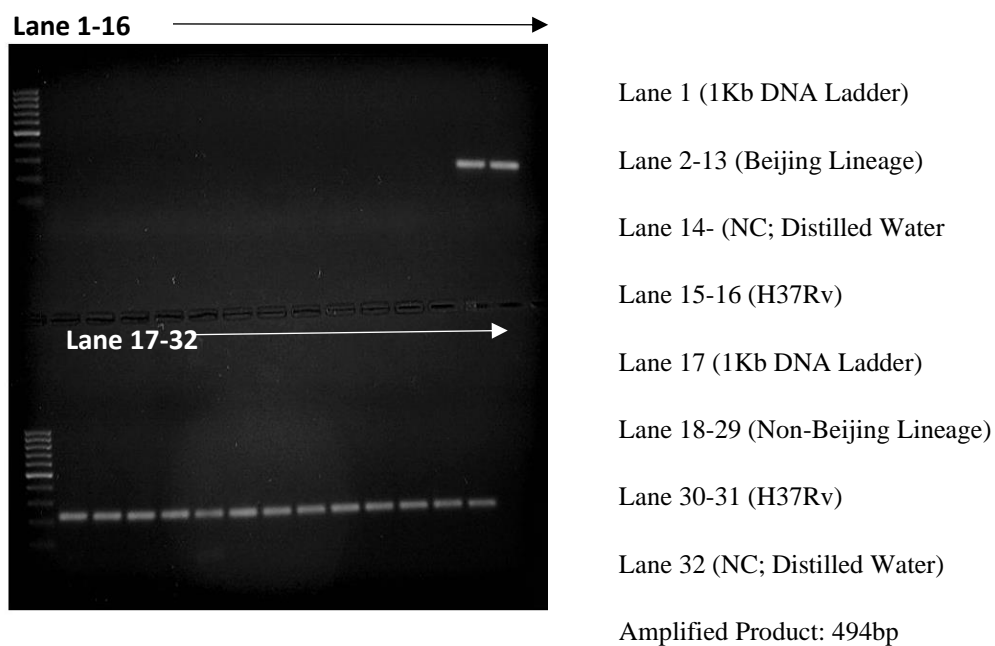

Fig.9B. Representation pic showing CRISPR Cas1 (*Rv2817c*) sequence elements deleted in Beijing
